# Supplementary material for: A Japanese Encephalitis Virus Vaccine Inducing Antibodies Strongly Enhancing In Vitro Infection Is Protective in Pigs
Source: Viruses. 2017 May 22;9(5):124. doi: 10.3390/v9050124 (PMC5454436; doi:10.3390/v9050124)
Supplement: Supplementary file 1 [file viruses-09-00124-s001.pdf]

## Supplementary Materials:

(a) JEV G1 Laos ADE of infection

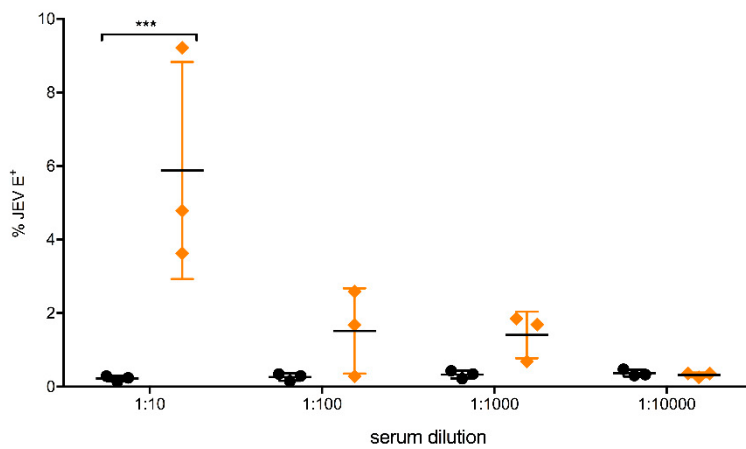

(b) JEV G3 Nakayama ADE of infection

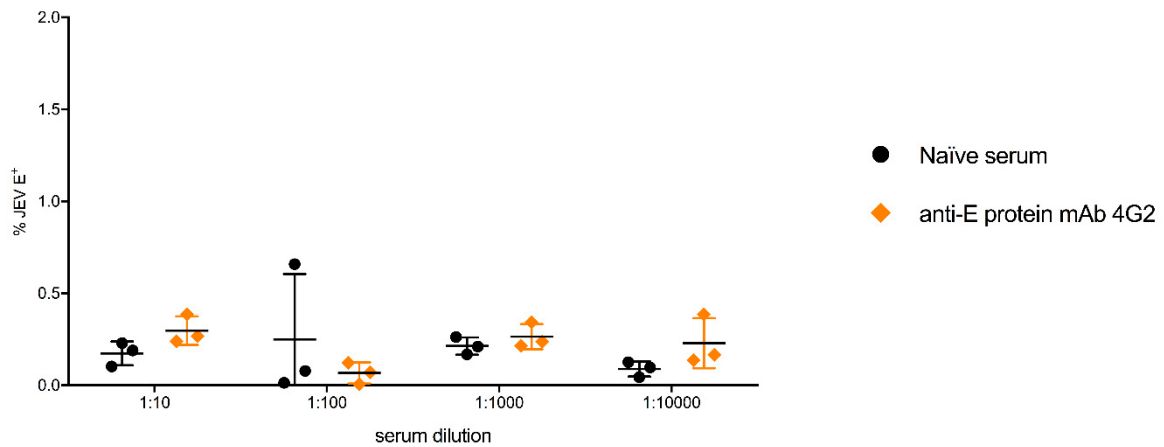

(c) JEV G3/5 (prM E from XZ0934) ADE of infection

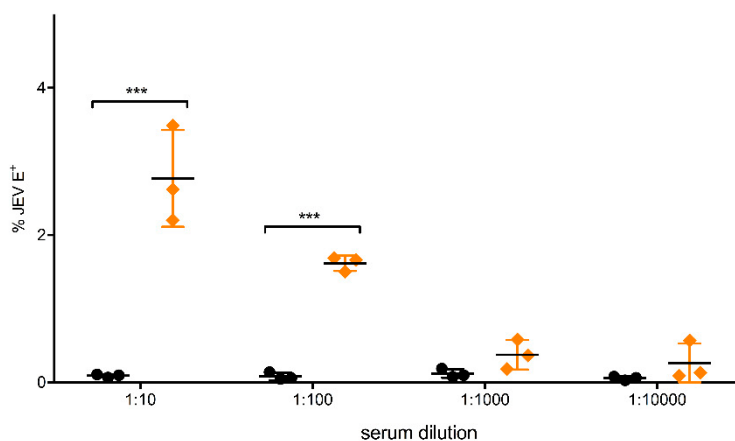

**Figure S1.** ADE of infection in murine macrophages J744A.1 cells. Anti-flavivirus E protein mAb 4G2 was tested for ADE activity in the murine macrophages J744A.1 cell line. ADE of infection was tested as described in figure 1 using ten-fold dilutions of the mAb instead of immune serum and for (a) JEV G1 Laos, (b) JEV G3 Nakayama and (c) JEV G5/G3, representing a chimeric virus expressing a G5 prM/E. The percentage of infected cells was determined after 24h. Statistical significance was calculated using a two-way Anova followed by Dunnett's multiple comparison. The results are representative of triplicate cultures repeated in two independent experiments. \*  $p < 0.05$ , \*\*  $p < 0.002$ , \*\*\*  $p < 0.001$ .
